# Supplementary material
Source: PubMed Central journal article supplement (PMC5363690)
Supplement: EBM693115_supplementary_material1.pdf [file EBM693115_supplementary_material1.pdf]

**Supplementary Table 1:**

| <b>Reference</b> | <b>Time to release 50% DOX<br/>in pH 5.0-5.5</b> | <b>Time to release 90% DOX<br/>in pH 5.0-5.5</b> |
|------------------|--------------------------------------------------|--------------------------------------------------|
| <b>AD-DOX</b>    | 4 days                                           | 40 days                                          |
| <b>[2]</b>       | 10 hours                                         | > 30 hours*                                      |
| <b>[3]</b>       | 6-8 hours                                        | 18-20 hours                                      |
| <b>[4]</b>       | 1-2 hours                                        | 12-15 hours                                      |
| <b>[10]</b>      | 35 hours                                         | >70 hours**                                      |
| <b>[14]</b>      | 3-6 hours***                                     | >11 hours***                                     |
| <b>[35]</b>      | 4 hours****                                      | 10 hours****                                     |

\*[2] reports release out to only 30 hours at which point the delivery system has not yet reached 90% release.

\*\*[10] reports release out to only 70 hours at which point the delivery system has not yet reached 90% release.

\*\*\*[14] showed range of release profiles depending upon the composition of the delivery system; reports release out to only 11 hours at which point the delivery system has not yet reached 90% release.

\*\*\*\*[35] values are reported for DOX-A1-D8 pH 5.5 delivery system.
