# Supplementary material
Source: PubMed Central journal article supplement (PMC5363690)
Supplement: EBM693115_supplementary_material2.pdf [file EBM693115_supplementary_material2.pdf]

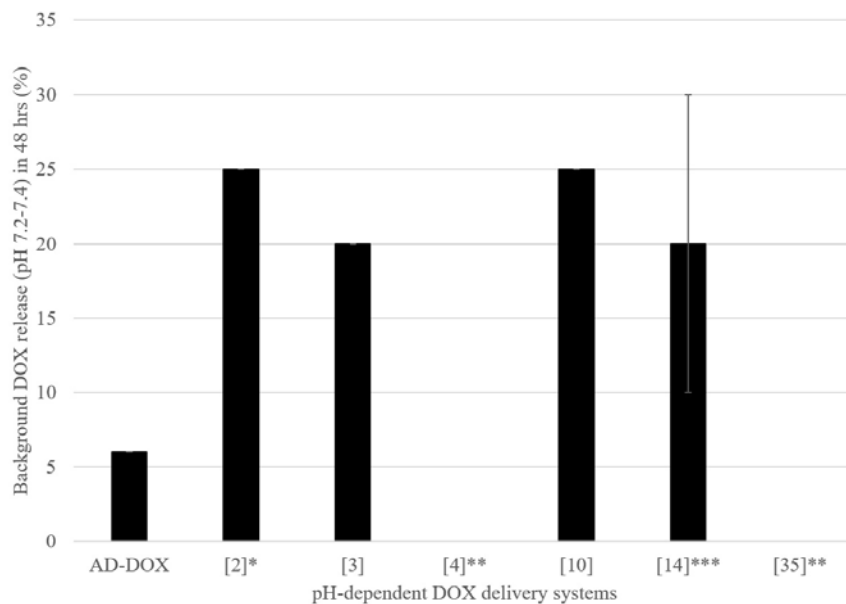

†All values are approximated from their respective original source<sup>2-4,10,14,35</sup>

\*[2] reports release out to only 30 hours

\*\*[4, 35] indicated ~0% of DOX released at pH 7.4

\*\*\*[14] showed range of background release between 10-30% depending upon the composition of the delivery system
